# Supplementary material
Source: PubMed Central journal article supplement (PMC2742409)
Supplement: NIHMS128212-supplement-Suppl_1.pdf [file NIHMS128212-supplement-Suppl_1.pdf]

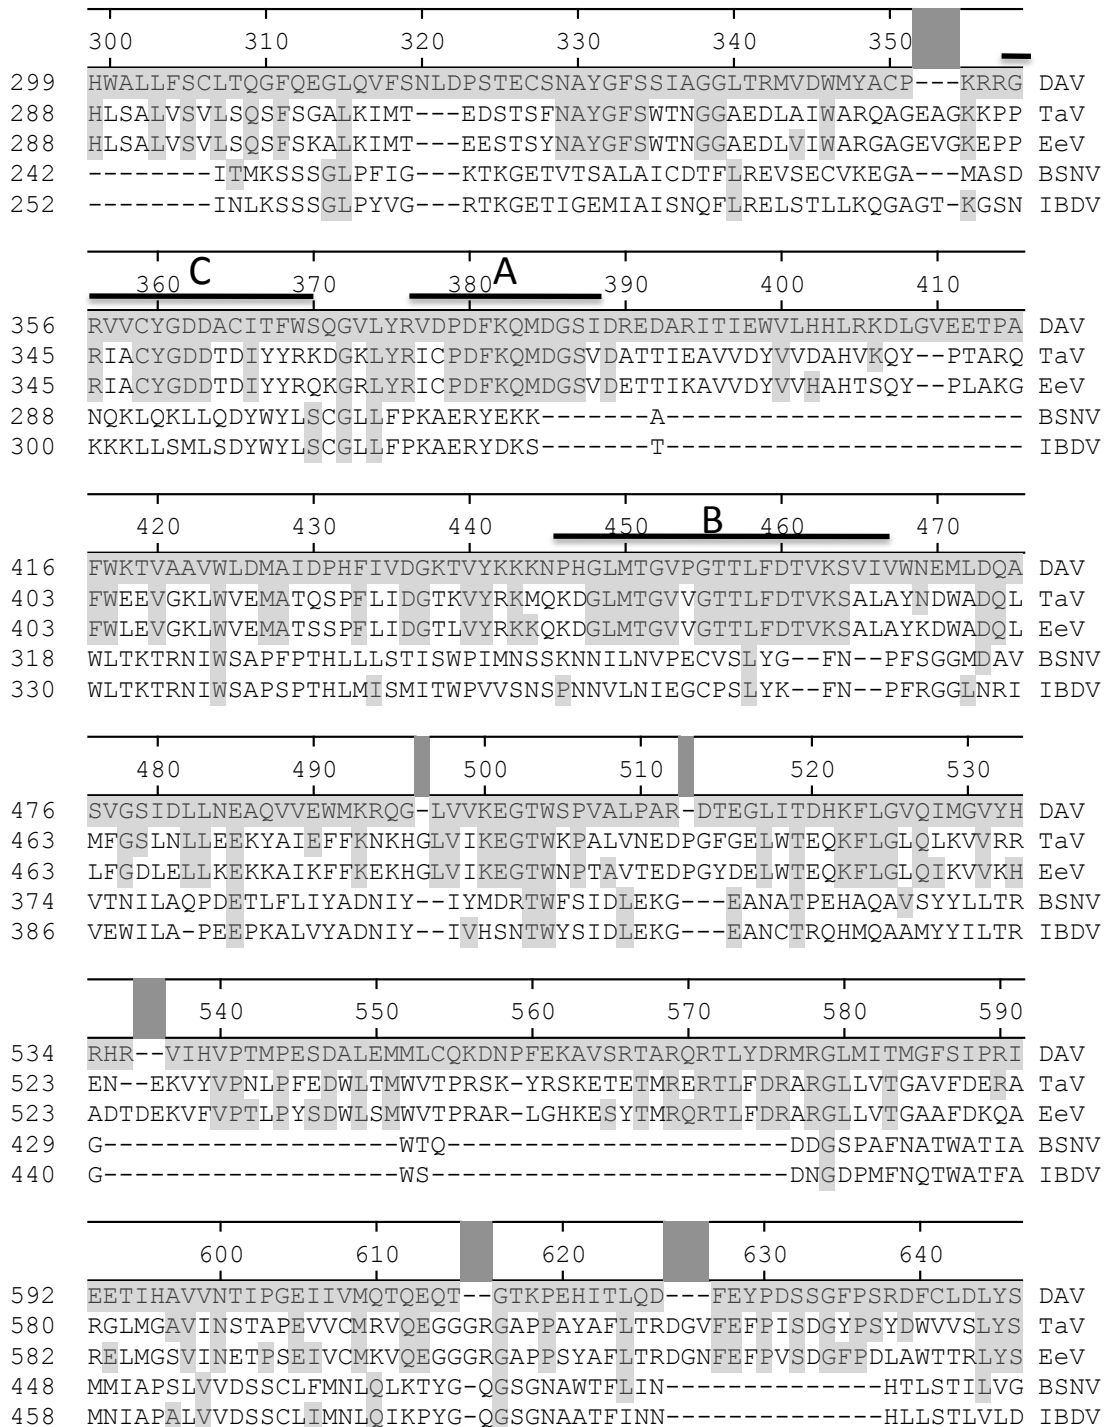

**Supplementary Figure 1. Alignment of RdRP showing C-A-B arrangement of RdRP motifs.** Virus RdRP regions as shown for *Drosophila A virus* (DAV), *Thosea asigna virus* (TaV), *Euprosterina elaeasa virus* (EEV), blotched snakehead virus (BSNV) and infectious bursal disease virus (IBDV). The regions identified as the C, A and B motifs are indicated. Amino acids matching the DAV sequence are boxed in grey and dashes represents gaps introduced to improve alignment. Alignment was performed using standard parameters for Clustal W in the DNA star software package.
